# Supplementary material
Source: MDPI journal article supplement (https://www.mdpi.com/2504-446X/7/2/140)
Supplement: s1 [file s1]

**Table S1.** List of flora taxa detected in each cliff type of the study area. Extra information includes endangered species (by the Ministry of Environment of South Korea: EN), Korea endemic species (KE), and alien species (AL) data. The word “sp.” indicates the taxa classified only up to the genus level.

| Family         | Scientific name                                     | Cliff type |        | Extra information |
|----------------|-----------------------------------------------------|------------|--------|-------------------|
|                |                                                     | Type-N     | Type-S |                   |
| Aizoaceae      | <i>Tetragonia tetragonoides</i>                     | ○          | ○      |                   |
| Anacardiaceae  | <i>Rhus javanica</i>                                | ○          | ○      |                   |
|                | <i>Toxicodendron succedaneum</i>                    | ○          | ○      |                   |
| Apiaceae       | <i>Centella asiatica</i>                            | ○          | ○      |                   |
|                | <i>Peucedanum japonicum</i>                         | ○          | ○      |                   |
|                | <i>Peucedanum terebinthaceum</i>                    | ○          | ○      |                   |
| Apocynaceae    | <i>Trachelospermum asiaticum</i>                    | ○          | ○      |                   |
| Araceae        | <i>Arisaema amurense</i>                            | ○          |        |                   |
|                | <i>Arisaema amurense</i> f. <i>serratum</i>         | ○          | ○      |                   |
| Araliaceae     | <i>Dendropanax trifidus</i>                         | ○          |        |                   |
|                | <i>Hedera rhombea</i>                               | ○          | ○      |                   |
| Asteraceae     | <i>Artemisia scoparia</i>                           | ○          | ○      |                   |
|                | <i>Aster hispidus</i>                               | ○          | ○      |                   |
|                | <i>Aster spathulifolius</i>                         | ○          | ○      |                   |
|                | <i>Cirsium japonicum</i> var. <i>maackii</i>        | ○          | ○      |                   |
|                | <i>Crepidiastrixeris denticulato-platyphylla</i>    | ○          | ○      |                   |
|                | <i>Dendranthema indicum</i>                         | ○          | ○      |                   |
|                | <i>Dendranthema zawadskii</i> var. <i>latilobum</i> | ○          | ○      |                   |
|                | <i>Farfugium japonicum</i>                          | ○          | ○      |                   |
|                | <i>Ligularia fischeri</i>                           | ○          |        |                   |
|                | <i>Saussurea polylepis</i>                          | ○          |        | KE                |
| Betulaceae     | <i>Carpinus turczaninowii</i>                       | ○          | ○      |                   |
| Campanulaceae  | <i>Platycodon grandiflorum</i>                      | ○          |        |                   |
| Celastraceae   | <i>Euonymus japonicus</i>                           | ○          | ○      |                   |
| Chenopodiaceae | <i>Chenopodium ficifolium</i>                       | ○          | ○      | AL                |
| Crassulaceae   | <i>Orostachys japonica</i>                          |            | ○      |                   |
|                | <i>Sedum polytrichoides</i>                         | ○          | ○      |                   |
| Cucurbitaceae  | <i>Trichosanthes kirilowii</i>                      | ○          |        |                   |
| Cupressaceae   | <i>Juniperus procumbens</i>                         | ○          | ○      |                   |
| Cyperaceae     | <i>Carex</i> sp.                                    |            | ○      |                   |

**Table S1.** Continued.

| Family          | Scientific name                            | Cliff type |        | Extra information |
|-----------------|--------------------------------------------|------------|--------|-------------------|
|                 |                                            | Type-N     | Type-S |                   |
| Cyperaceae      | <i>Carex wahuensis</i> var. <i>robusta</i> | ○          | ○      |                   |
| Dioscoreaceae   | <i>Dioscorea polystachya</i>               | ○          | ○      |                   |
| Dryopteridaceae | <i>Cyrtomium falcatum</i>                  | ○          | ○      |                   |
| Elaeagnaceae    | <i>Elaeagnus macrophylla</i>               | ○          | ○      |                   |
| Euphorbiaceae   | <i>Mallotus japonicus</i>                  | ○          | ○      |                   |
| Fabaceae        | <i>Indigofera koreana</i>                  | ○          |        | KE                |
|                 | <i>Lespedeza cyrtobotrya</i>               | ○          | ○      |                   |
|                 | <i>Pueraria lobata</i>                     | ○          | ○      |                   |
| Fagaceae        | <i>Castanopsis sieboldii</i>               | ○          | ○      |                   |
|                 | <i>Quercus acuta</i>                       | ○          | ○      |                   |
|                 | <i>Quercus dentata</i>                     | ○          | ○      |                   |
| Lauraceae       | <i>Litsea japonica</i>                     | ○          | ○      |                   |
|                 | <i>Machilus thunbergii</i>                 |            | ○      |                   |
|                 | <i>Neolitsea sericea</i>                   |            | ○      |                   |
| Liliaceae       | <i>Allium pseudojaponicum</i>              | ○          | ○      |                   |
|                 | <i>Asparagus cochinchinensis</i>           | ○          |        |                   |
|                 | <i>Hemerocallis hongdoensis</i>            | ○          | ○      | KE                |
|                 | <i>Hosta yingeri</i>                       | ○          | ○      | KE                |
|                 | <i>Lilium lancifolium</i>                  | ○          | ○      |                   |
|                 | <i>Liriope platyphylla</i>                 | ○          | ○      |                   |
|                 | <i>Ophiopogon jaburan</i>                  | ○          | ○      |                   |
| Menispermaceae  | <i>Cocculus trilobus</i>                   | ○          |        |                   |
| Moraceae        | <i>Broussonetia</i> × <i>kazinoki</i>      | ○          |        |                   |
|                 | <i>Ficus erecta</i>                        |            | ○      |                   |
| Oleaceae        | <i>Fraxinus sieboldiana</i>                | ○          | ○      |                   |
|                 | <i>Ligustrum japonicum</i>                 | ○          | ○      |                   |
| Orchidaceae     | <i>Calanthe</i> sp.                        |            | ○      |                   |
|                 | <i>Dendrobium moniliforme</i>              |            | ○      | EN                |
|                 | <i>Neofinetia falcata</i>                  | ○          | ○      | EN                |
| Oxalidaceae     | <i>Oxalis corniculata</i>                  | ○          | ○      |                   |

**Table S1.** Continued.

| Family          | Scientific name                                  | Cliff type |        | Extra information |
|-----------------|--------------------------------------------------|------------|--------|-------------------|
|                 |                                                  | Type-N     | Type-S |                   |
| Pinaceae        | <i>Pinus densiflora</i>                          | ○          | ○      |                   |
| Pittosporaceae  | <i>Pittosporum tobira</i>                        | ○          | ○      |                   |
| Poaceae         | <i>Arundinella hirta</i>                         | ○          | ○      |                   |
|                 | <i>Calamagrostis arundinacea</i>                 | ○          |        |                   |
|                 | <i>Eulalia speciosa</i>                          | ○          | ○      |                   |
|                 | <i>Festuca ovina</i>                             | ○          | ○      |                   |
|                 | <i>Miscanthus sinensis</i>                       | ○          | ○      |                   |
|                 | <i>Pseudosasa japonica</i>                       | ○          |        |                   |
|                 | <i>Setaria viridis</i>                           | ○          | ○      |                   |
| Polygonaceae    | <i>Rumex crispus</i>                             | ○          | ○      | AL                |
| Polypodiaceae   | <i>Lepisorus thunbergianus</i>                   |            | ○      |                   |
|                 | <i>Pyrrosia hastata</i>                          |            | ○      |                   |
|                 | <i>Pyrrosia lingua</i>                           | ○          | ○      |                   |
| Primulaceae     | <i>Lysimachia pentapetala</i>                    | ○          | ○      |                   |
| Ranunculaceae   | <i>Clematis terniflora</i>                       |            | ○      |                   |
| Rosaceae        | <i>Prunus jamasakura</i>                         | ○          | ○      |                   |
|                 | <i>Rhaphiolepis indica</i> var. <i>umbellata</i> | ○          | ○      |                   |
|                 | <i>Rosa multiflora</i>                           | ○          | ○      |                   |
|                 | <i>Rubus hirsutus</i>                            | ○          | ○      |                   |
|                 | <i>Rubus parvifolius</i>                         | ○          | ○      |                   |
| Rubiaceae       | <i>Paederia foetida</i>                          | ○          | ○      |                   |
|                 | <i>Rubia cordifolia</i>                          | ○          | ○      |                   |
| Rutaceae        | <i>Zanthoxylum ailanthoides</i>                  |            | ○      |                   |
|                 | <i>Zanthoxylum schinifolium</i>                  |            | ○      |                   |
| Selaginellaceae | <i>Selaginella involvens</i>                     | ○          | ○      |                   |
| Smilacaceae     | <i>Smilax china</i>                              | ○          | ○      |                   |
| Theaceae        | <i>Camellia japonica</i>                         | ○          | ○      |                   |
|                 | <i>Eurya emarginata</i>                          | ○          | ○      |                   |
|                 | <i>Eurya japonica</i>                            | ○          | ○      |                   |
| Urticaceae      | <i>Boehmeria nivea</i> var. <i>tenacissima</i>   | ○          |        |                   |

**Table S1.** Continued.

| Family      | Scientific name                    | Cliff type |        | Extra information |
|-------------|------------------------------------|------------|--------|-------------------|
|             |                                    | Type-N     | Type-S |                   |
| Verbenaceae | <i>Caryopteris incana</i>          | ○          | ○      |                   |
| Viburnaceae | <i>Viburnum erosum</i>             | ○          | ○      |                   |
| Vitaceae    | <i>Ampelopsis brevipedunculata</i> | ○          | ○      |                   |
|             | <i>Parthenocissus tricuspidata</i> | ○          | ○      |                   |
